# Supplementary material for: The Effect of Intervertebral Cartilage on Neutral Posture and Range of Motion in the Necks of Sauropod Dinosaurs
Source: PLoS One. 2013 Oct 30;8(10):e78214. doi: 10.1371/journal.pone.0078214 (PMC3812996; doi:10.1371/journal.pone.0078214)
Supplement: File S1 — Data from Table 1 in more useful format. (XLS) [file pone.0078214.s001.xls]

## Sheet: Sheet1
Measurements of turkey necks
Neck #	1	2	3	4	5	6	7
Intact mass (g)	154	122	154	133	142	80	70
Length (mm)	189.5	161	209.5	172.5	179	177	179
Length of articulated wet verts	186
Length of articulated dry verts	179

## Sheet: Sheet2
WET
Vertebra	Centrum	Prezyg		Postzyg
	Length	L	R	L	R
A	22.5	6.78	7.3	7.86	8.48
B	24.5	7.53	7.43	8.28	7.53
C	25.05	7.43	6.76	7.63	8.87
D	24.5	7.47	8.11	8.88	8.83
E	24.5	8.45	8.86	8.96	9.27
F	24	8.58	8.76	8.12	9.53
G	22.8	9.28	9.51	8.46	9.67
H	19.6	9.57	10.93	7.2	8.61
Total/Average	187.45	8.13625	8.4575	8.17375	8.84875
		8.29688		8.51125
DRY							RATIO wet:dry
Vertebra	Centrum	Prezyg		Postzyg			Vertebra	Centrum	Prezyg		Postzyg
	Length	L	R	L	R			Length	L	R	L	R
A	23.28	5.95	6.44	6.72	6.63		A	0.966495	1.1395	1.13354	1.16964	1.27903
B	23.88	6.59	6.56	7.22	7.21		B	1.02596	1.14264	1.13262	1.14681	1.04438
C	23.96	6.54	6.5	7.8	7.82		C	1.04549	1.13609	1.04	0.978205	1.13427
D	23.6	7.23	7.17	7.84	7.81		D	1.03814	1.0332	1.1311	1.13265	1.1306
E	23.54	7.74	7.61	8.54	8.46		E	1.04078	1.09173	1.16426	1.04918	1.09574
F	23.01	7.61	7.96	8.24	8.34		F	1.04302	1.12746	1.1005	0.985437	1.14269
G	22.05	8.1	8.34	8.46	7.97		G	1.03401	1.14568	1.14029	1	1.2133
H	18.56	9.39	9.56	6.59	7.07		H	1.05603	1.01917	1.14331	1.09256	1.21782
Total/Average	181.88	7.39375	7.5175	7.67625	7.66375		MEAN	1.03124	1.10443	1.1232	1.06931	1.15723
		7.45562		7.67					1.11382		1.11327
DEGREASED							RATIO wet:degreased
Vertebra	Centrum	Prezyg		Postzyg			Vertebra	Centrum	Prezyg		Postzyg
	Length	L	R	L	R			Length	L	R	L	R
A	23.15	5.89	6.5	6.42	7.84		A	0.971922	1.1511	1.12308	1.2243	1.08163
B	23.72	6.6	6.52	7.17	7.43		B	1.03288	1.14091	1.13957	1.15481	1.01346
C	23.8	6.39	6.37	7.67	7.54		C	1.05252	1.16275	1.06122	0.994785	1.17639
D	23.56	6.93	7.06	8.25	7.69		D	1.0399	1.07792	1.14873	1.07636	1.14824
E	23.52	7.83	7.55	8.55	8.39		E	1.04167	1.07918	1.17351	1.04795	1.10489
F	22.96	7.48	7.95	8.18	7.98		F	1.0453	1.14706	1.10189	0.992665	1.19424
G	22	8.08	7.56	7.78	7.58		G	1.03636	1.14851	1.25794	1.0874	1.27573
H	18.52	10.1	9.7	8.01	7.17		H	1.05832	0.947525	1.1268	0.898876	1.20084
Total/Average	181.23	7.4125	7.40125	7.75375	7.7025		MEAN	1.03486	1.10687	1.14159	1.05964	1.14943
		7.40688		7.72813					1.12423		1.10454
